# Supplementary material
Source: publisher figshare collection journal article supplement (https://sage.figshare.com/ndownloader/files/13163378)

Supplementary figure 1. Flowchart of Search Strategy and Selection Process

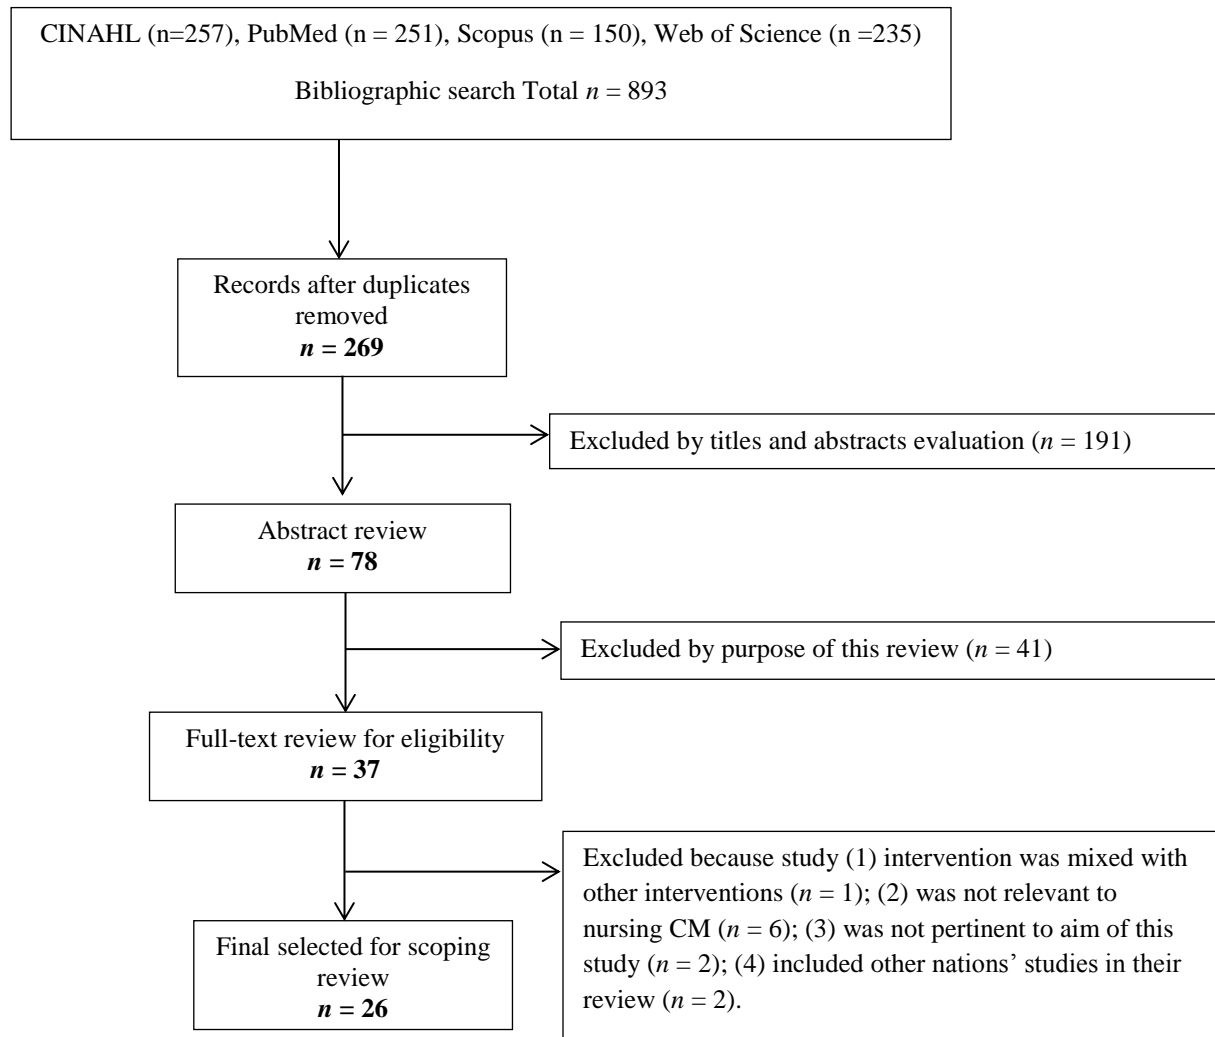

Supplement: Supplementary file 1 [file 13163378]
